# Supplementary material
Source: PubMed Central journal article supplement (PMC5772227)
Supplement: AEM.02300-17_zam003188290s1.pdf [file AEM.02300-17_zam003188290s1.pdf]

|                                               |     |          |            |        |        |          |        |          |        |         |          |              |               |                 |         |     |
|-----------------------------------------------|-----|----------|------------|--------|--------|----------|--------|----------|--------|---------|----------|--------------|---------------|-----------------|---------|-----|
| <i>Streptomyces albus</i> subsp. <i>albus</i> | 167 | TLIAEELT | SRGYVVAIVD | HAYE   | SVGAR  | FPGGRMLT | CAAC   | DKYQDTGL | --     | AYVAEGR | AKDVSE   | LLDRLTGP     | 234           |                 |         |     |
| <i>Streptomyces</i> sp. NRRL S-495            | 170 | TALGEEL  | AARGYAVA   | AVDHTY | ETL    | -VEF     | PGGRIE | PCLVCG   | REGTDP | DFGATAS | RVRAAD   | DLRFVIDRLTAP | 238           |                 |         |     |
| <i>Streptomyces</i> sp. XY431                 | 182 | TALGEEL  | AARGYAVA   | AVDHTY | ETL    | -VEF     | PGGRIE | PCLVCG   | REGTDP | DFGATAS | RVRAAD   | DLRFVIDRLTAP | 250           |                 |         |     |
| <i>Streptomyces roseovercillatus</i>          | 177 | TGLGED   | LASRGY     | AVA    | AVDHTY | EAP      | -VEF   | PGGRIE   | ACEIC  | QKYDLLP | ----     | AVVPNR       | SKDIRFLDQLTGP | 241             |         |     |
| <i>Streptomyces</i> sp. MBT76                 | 138 | TALGED   | LASRGY     | AVA    | AVDHTY | EAP      | -VEF   | PGGRIE   | TCE    | CAK     | PDM      | -----        | AAVVRN        | RAKDFSEL        | LDRLTAP | 201 |
| R18                                           | 109 | TALGED   | LASRGY     | AVA    | AVDHTY | EAP      | -VEF   | PGGRIE   | KCTL   | CDDSR   | MDP      | ----         | GAVVRN        | RAKDLRFVLDRLTGP | 174     |     |
| TH2-18                                        | 112 | TALGED   | LASRGY     | AVA    | ALDHTY | EAP      | -VEF   | PGGR     | VEPCL  | ICEK    | PDLN     | -----        | AVVRN         | RAQDIRFLDRLTGP  | 175     |     |
| <i>Streptomyces caatingaensis</i>             | 136 | TALAE    | DLASRGY    | VVAAL  | DHTY   | ESA      | -VEF   | PGGR     | VEK    | CEL     | CAKEDVDN | ---          | GALVRN        | RAEDIRFLDRLTGP  | 201     |     |
| <i>Streptomyces mobaraensis</i>               | 158 | TSVAEEL  | ASRGY      | VVA    | VDHTY  | EAA      | -VEF   | PGGRIE   | QCAI   | CGPE    | QRDN     | ---          | AAVVRN        | RAKDLRFVLDRLTAD | 223     |     |

Fig. S1

**Conservation of CXXC motif between R18 and its homologous genes.** Alignment showing the loop sequence, Cys-143, and Cys-146 on R18. Arrows represent cysteine residues in the CXXC motif.

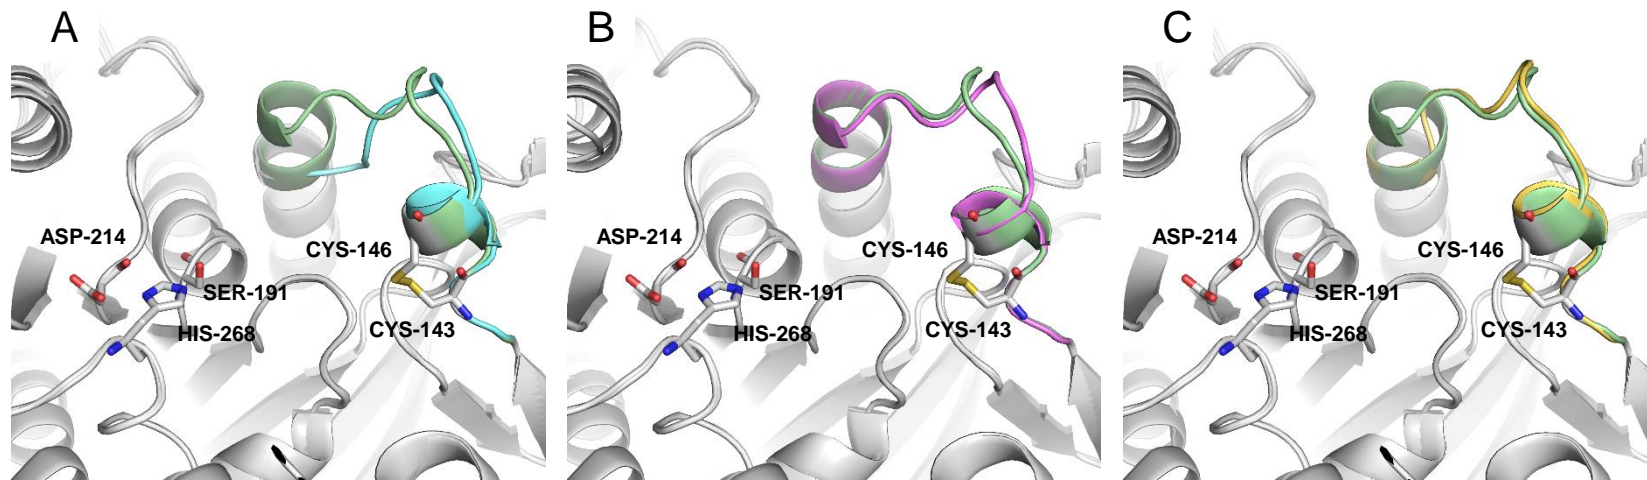

Fig.S2

**Comparison of the loop structures of rR18, rTH2-18, rTH2-18PG, and rR18 $\Delta$ PG.** Close-up view of the loop structures of rR18 (green) and rTH2-18 (cyan) (A), rR18 and rTH2-18PG (magenta) (B), and rR18 and rR18 $\Delta$ PG (yellow) (C). The catalytic triad, Cys-143, and Cys-146 on rR18 are represented as sticks with the oxygen atom in red, the nitrogen atom in blue, sulfur atoms in yellow, and carbon atoms in white.
